# Supplementary material for: Impact of shade on outdoor thermal comfort—a seasonal field study in Tempe, Arizona
Source: Springer Nature journal article supplement (doi:10.1007/s00484-016-1172-5), 2016-05-18
Supplement: MOESM1 [file 484_2016_1172_MOESM1_ESM.pdf]

|                                               |                  |                 |                  |                  |                  |                 |
|-----------------------------------------------|------------------|-----------------|------------------|------------------|------------------|-----------------|
| <b>Field work days</b>                        | <b>22-Jan-15</b> | <b>2-Apr-15</b> | <b>10-Jun-14</b> | <b>12-Jun-14</b> | <b>19-Jun-14</b> | <b>7-Nov-14</b> |
| Mean temperature [°C]                         | 14.0             | 24.0            | 36.0             | 34.0             | 32.0             | 22.0            |
| Max temperature [°C]                          | 18.0             | 31.0            | 43.0             | 42.0             | 39.0             | 29.0            |
| Wind velocity [ms <sup>-1</sup> ]             | 4.6              | 4.1             | 3.9              | 3.2              | 2.6              | 2.2             |
|                                               |                  |                 |                  |                  |                  |                 |
| <b>Seasonal normals</b>                       | <b>DJF</b>       | <b>MAM</b>      | <b>JJA</b>       | <b>JJA</b>       | <b>JJA</b>       | <b>SON</b>      |
| Normal daily mean temperature [°C]            | 14.0             | 23.0            | 33.9             | 33.9             | 33.9             | 24.7            |
| Normal daily max temperature [°C]             | 20.0             | 29.8            | 40.4             | 40.4             | 40.4             | 31.1            |
| Normal mean wind velocity [ms <sup>-1</sup> ] | 2.4              | 3.0             | 3.0              | 3.0              | 3.0              | 2.7             |
| Percent possible sunshine [%]                 | 79.3             | 89.3            | 89.0             | 89.0             | 89.0             | 86.7            |
|                                               |                  |                 |                  |                  |                  |                 |
| <b>Difference from seasonal normals</b>       |                  |                 |                  |                  |                  |                 |
| Mean temperature [°C]                         | 0.0              | 1.0             | 2.1              | 0.1              | -1.9             | -2.7            |
| Max temperature [°C]                          | -2.0             | 1.2             | 2.6              | 1.6              | -1.4             | -2.1            |
| Wind velocity [ms <sup>-1</sup> ]             | 2.2              | 1.1             | 0.9              | 0.2              | -0.4             | -0.5            |

**Table 1:** Comparison of conditions on field work days to seasonal normals (Phoenix KPHX weather station, 30 year normals (1981-2010), NCDC).

|                       |     | Surface Temperature | WBG T | Globe Temperature | Air Temperature | Relative Humidity | Dew Point | Heat Index | Wind Speed | K_up   | K_down | Ne |
|-----------------------|-----|---------------------|-------|-------------------|-----------------|-------------------|-----------|------------|------------|--------|--------|----|
|                       |     | [°C]                | [°C]  | [°C]              | [°C]            | [%]               | [°C]      | [°C]       | [m/s]      | [Wm-2] | [Wm-2] | [W |
| 22-Jan-15             | AVE | 16.5                | 10.4  | 18.8              | 15.6            | 15.3              | -9.6      | 12.7       | 1.1        | 33.7   | 129.9  |    |
|                       | SD  | 5.9                 | 2.4   | 5.5               | 2.3             | 3.6               | 1.3       | 1.9        | 1.4        | 39.3   | 192.5  |    |
|                       | MIN | 3.0                 | 6.4   | 11.1              | 10.8            | 12.4              | -12.2     | 9.1        | 0.0        | 0.0    | 0.0    |    |
|                       | MAX | 35.0                | 18.7  | 32.8              | 19.3            | 26.2              | -6.5      | 18.0       | 2.4        | 134.2  | 610.0  |    |
| 2-Apr-15              | AVE | 27.9                | 19.2  | 30.5              | 27.3            | 16.0              | 0.6       | 24.8       | 0.5        | 35.2   | 161.6  |    |
|                       | SD  | 6.7                 | 2.5   | 5.1               | 3.0             | 3.8               | 2.5       | 2.7        | 0.3        | 42.3   | 238.7  |    |
|                       | MIN | 13.0                | 14.2  | 21.9              | 20.5            | 12.2              | -4.0      | 18.4       | 0.0        | 0.0    | 0.0    |    |
|                       | MAX | 47.0                | 25.1  | 43.3              | 30.6            | 25.3              | 6.3       | 30.0       | 1.4        | 150.4  | 849.0  |    |
| June 10, 12, 19, 2014 | AVE | 38.9                | 24.4  | 37.5              | 34.8            | 16.6              | 5.6       | 35.7       | 0.6        | 70.8   | 284.7  |    |
|                       | SD  | 8.5                 | 2.6   | 5.7               | 3.1             | 3.5               | 2.3       | 4.3        | 0.4        | 55.2   | 343.2  |    |
|                       | MIN | 20.0                | 19.9  | 29.2              | 28.3            | 11.0              | 2.2       | 25.8       | 0.0        | 26.5   | 25.2   |    |
|                       | MAX | 64.0                | 31.8  | 51.7              | 43.0            | 33.3              | 13.0      | 44.3       | 1.9        | 195.0  | 972.0  |    |
| 7-Nov-14              | AVE | 22.9                | 18.2  | 26.8              | 24.3            | 20.0              | 4.7       | 22.4       | 0.3        | 27.3   | 99.0   |    |
|                       | SD  | 5.8                 | 2.8   | 6.1               | 3.1             | 5.8               | 1.1       | 2.8        | 0.4        | 40.6   | 175.7  |    |
|                       | MIN | 12.0                | 13.9  | 18.6              | 18.2            | 18.7              | 2.3       | 16.6       | 0.0        | 0.0    | 0.0    |    |
|                       | MAX | 39.0                | 27.0  | 44.7              | 30.8            | 40.3              | 8.1       | 29.9       | 2.0        | 133.6  | 641.4  |    |

**Table 2:** Descriptive statistics of the observed variables in each season

|                             | $\beta$ | $t$     | $p$     |
|-----------------------------|---------|---------|---------|
| <b>(Constant)</b>           |         | -25.784 | 0.000** |
| <b>WBGT</b>                 | 0.301   | 1.750   | 0.080   |
| <b>Air Temperature</b>      | 0.212   | 1.432   | 0.152   |
| <b>Water Vapor Pressure</b> | -0.059  | -1.159  | 0.247   |
| <b>Surface Temperature</b>  | -0.069  | -1.052  | 0.293   |
| <b>K↓</b>                   | -0.154  | -1.843  | 0.066   |
| <b>K↑</b>                   | 0.107   | 1.116   | 0.265   |
| <b>Globe temperature</b>    | 0.356   | 2.906   | 0.004** |

**Table 3:** Multiple regression analysis ( $N=1284$ ) to determine which meteorological observations significantly impact thermal comfort (\*\* $p < .01$ ).
