# Supplementary material for: Impact of shade on outdoor thermal comfort—a seasonal field study in Tempe, Arizona
Source: Springer Nature journal article supplement (doi:10.1007/s00484-016-1172-5), 2016-05-18
Supplement: MOESM2 [file 484_2016_1172_MOESM2_ESM.pdf]

|                       |     | Surface temperature | WBGT | Globe temperature | Air temperature | Relative humidity | Dew point | Heat index | Wind speed          | K_up                | K_down              | Net radiation       |
|-----------------------|-----|---------------------|------|-------------------|-----------------|-------------------|-----------|------------|---------------------|---------------------|---------------------|---------------------|
|                       |     | [°C]                | [°C] | [°C]              | [°C]            | [%]               | [°C]      | [°C]       | [ms <sup>-1</sup> ] | [Wm <sup>-2</sup> ] | [Wm <sup>-2</sup> ] | [Wm <sup>-2</sup> ] |
| 22-Jan-15             | AVE | 16.5                | 10.4 | 18.8              | 15.6            | 15.3              | -9.6      | 12.7       | 1.1                 | 33.7                | 129.9               | 75.5                |
|                       | SD  | 5.9                 | 2.4  | 5.5               | 2.3             | 3.6               | 1.3       | 1.9        | 1.4                 | 39.3                | 192.5               | 149.6               |
|                       | MIN | 3.0                 | 6.4  | 11.1              | 10.8            | 12.4              | -12.2     | 9.1        | 0.0                 | 0.0                 | 0.0                 | -132.3              |
|                       | MAX | 35.0                | 18.7 | 32.8              | 19.3            | 26.2              | -6.5      | 18.0       | 2.4                 | 134.2               | 610.0               | 491.2               |
| 2-Apr-15              | AVE | 27.9                | 19.2 | 30.5              | 27.3            | 16.0              | 0.6       | 24.8       | 0.5                 | 35.2                | 161.6               | 111.9               |
|                       | SD  | 6.7                 | 2.5  | 5.1               | 3.0             | 3.8               | 2.5       | 2.7        | 0.3                 | 42.3                | 238.7               | 164.9               |
|                       | MIN | 13.0                | 14.2 | 21.9              | 20.5            | 12.2              | -4.0      | 18.4       | 0.0                 | 0.0                 | 0.0                 | -96.8               |
|                       | MAX | 47.0                | 25.1 | 43.3              | 30.6            | 25.3              | 6.3       | 30.0       | 1.4                 | 150.4               | 849.0               | 561.6               |
| June 10, 12, 19, 2014 | AVE | 38.9                | 24.4 | 37.5              | 34.8            | 16.6              | 5.6       | 35.7       | 0.6                 | 70.8                | 284.7               | 167.5               |
|                       | SD  | 8.5                 | 2.6  | 5.7               | 3.1             | 3.5               | 2.3       | 4.3        | 0.4                 | 55.2                | 343.2               | 215.0               |
|                       | MIN | 20.0                | 19.9 | 29.2              | 28.3            | 11.0              | 2.2       | 25.8       | 0.0                 | 26.5                | 25.2                | -19.8               |
|                       | MAX | 64.0                | 31.8 | 51.7              | 43.0            | 33.3              | 13.0      | 44.3       | 1.9                 | 195.0               | 972.0               | 642.7               |
| 7-Nov-14              | AVE | 22.9                | 18.2 | 26.8              | 24.3            | 20.0              | 4.7       | 22.4       | 0.3                 | 27.3                | 99.0                | 74.5                |
|                       | SD  | 5.8                 | 2.8  | 6.1               | 3.1             | 5.8               | 1.1       | 2.8        | 0.4                 | 40.6                | 175.7               | 162.1               |
|                       | MIN | 12.0                | 13.9 | 18.6              | 18.2            | 18.7              | 2.3       | 16.6       | 0.0                 | 0.0                 | 0.0                 | -85.6               |
|                       | MAX | 39.0                | 27.0 | 44.7              | 30.8            | 40.3              | 8.1       | 29.9       | 2.0                 | 133.6               | 641.4               | 553.1               |

**Table 2:** Descriptive statistics of the observed variables in each season
