# Supplementary material for: Impact of shade on outdoor thermal comfort—a seasonal field study in Tempe, Arizona
Source: Springer Nature journal article supplement (doi:10.1007/s00484-016-1172-5), 2016-05-18
Supplement: MOESM3 [file 484_2016_1172_MOESM3_ESM.pdf]

|                             | $\beta$ | $t$     | $p$     |
|-----------------------------|---------|---------|---------|
| <b>(Constant)</b>           |         | -25.784 | 0.000** |
| <b>WBGT</b>                 | 0.301   | 1.750   | 0.080   |
| <b>Air temperature</b>      | 0.212   | 1.432   | 0.152   |
| <b>Water vapor pressure</b> | -0.059  | -1.159  | 0.247   |
| <b>Surface temperature</b>  | -0.069  | -1.052  | 0.293   |
| <b>K↓</b>                   | -0.154  | -1.843  | 0.066   |
| <b>K↑</b>                   | 0.107   | 1.116   | 0.265   |
| <b>Globe temperature</b>    | 0.356   | 2.906   | 0.004** |

**Table 3:** Multiple regression analysis ( $N=1284$ ) to determine which meteorological observations significantly impact thermal comfort (\*\* $p < .01$ ).
